# Supplementary material for: The effect of chlorhexidine mouthwash on gingival health around stainless steel crowns in primary molars
Source: Research Square preprint supplement (doi:10.21203/rs.3.rs-7058941/v1), 2025-08-21
Supplement: Supplementary file 1 [file 8817c2adfcb0a5bb3090983e.docx]

CONSORT 2010 Checklist of Information to Include When Reporting a Randomized Trial

| Section/Topic | Item No. | Checklist item | Reported on page No. |
| --- | --- | --- | --- |
| Title and abstract | 1a | Identification as a randomized trial in the title | Title Page |
|  | 1b | Structured summary of trial design, methods, results, and conclusions | Abstract (p. 2) |
| Introduction | 2a | Scientific background and explanation of rationale | p. 3 |
|  | 2b | Specific objectives or hypotheses | p. 3 |
| Methods | 3a | Description of trial design (parallel, randomized, double-blinded) | p. 4 |
|  | 3b | Important changes to methods after trial commencement (with reasons) | Not applicable |
|  | 4a | Eligibility criteria for participants | p. 4 |
|  | 4b | Settings and locations where the data were collected | p. 4 |
|  | 5 | Detailed description of interventions | p. 4 |
|  | 6a | Defined primary and secondary outcome measures | p. 4-5 |
|  | 6b | Changes to trial outcomes after it started | Not applicable |
|  | 7a | How sample size was determined | p. 4 |
|  | 7b | Interim analyses and stopping guidelines | Not applicable |
|  | 8a | Method used to generate random allocation sequence | p. 5 |
|  | 8b | Type of randomization, blocking, stratification | p. 5 |
|  | 9 | Allocation concealment mechanism | p. 5 |
|  | 10 | Who generated sequence, enrolled participants, assigned intervention | p. 5 |
|  | 11a | Blinding (who was blinded) | p. 4 |
|  | 11b | Description of similarity of interventions | p. 6 |
|  | 12a | Statistical methods used | p. 5 |
|  | 12b | Methods for additional/subgroup analyses | Not applicable |
| Results | 13a | Participant flow (numbers randomized, treated, analyzed) | p. 4, Figure 1 |
|  | 13b | Losses and exclusions after randomization | p. 5 |
|  | 14a | Dates of recruitment and follow-up | p. 4 |
|  | 14b | Why the trial ended or was stopped | Not applicable |
|  | 15 | Baseline demographic and clinical characteristics | Not included |
|  | 16 | Number analyzed for each outcome | p. 5-6, Tables 1–2 |
|  | 17a | Outcomes and estimation | p. 5–7 |
|  | 17b | Absolute/relative effect sizes with confidence intervals | Not applicable |
|  | 18 | Ancillary analyses | Not applicable |
|  | 19 | Harms or unintended effects | p. 8 |
| Discussion | 20 | Trial limitations | p. 9 |
|  | 21 | Generalizability of the findings | p. 9 |
|  | 22 | Interpretation consistent with results and evidence | p. 8-9 |
| Other information | 23 | Registration number and registry name | Abstract & p. 10 |
|  | 24 | Protocol availability | p. 10 |
|  | 25 | Sources of funding and role of funders | p. 9 |
